# Supplementary material for: Resolving cell state in iPSC-derived human neural samples with multiplexed fluorescence imaging
Source: PubMed Central journal article supplement (PMC8225800; doi:10.1038/s42003-021-02276-x), 2021-06-24
Supplement: 42003_2021_2276_MOESM2_ESM.pdf [file 42003_2021_2276_MOESM2_ESM.pdf]

# SUPPLEMENTARY INFORMATION

## **Resolving cell state in iPSC-derived human neural samples with multiplexed fluorescence imaging**

Martin L. Tomov<sup>1,2,3</sup>, Alison O'Neil<sup>1,2</sup>, Hamdah S. Abbasi<sup>4</sup>, Beth A. Cimini<sup>4</sup>, Anne E. Carpenter<sup>4</sup>, Lee L. Rubin<sup>1,2\*</sup>, Mark Bathe<sup>1,3\*</sup>.

1. Stanley Center for Psychiatric Research, Broad Institute of MIT and Harvard, Cambridge, MA, USA

2. Dept. of Stem Cell and Regenerative Biology, Harvard University, Cambridge, MA, USA

3. Dept. of Biological Engineering, MIT, Cambridge, MA, USA

4. Imaging Platform at Broad Institute of MIT and Harvard, Cambridge, MA, USA

\*These authors jointly supervised this work.

Correspondence to: Lee Rubin [lee\\_rubin@harvard.edu](mailto:lee_rubin@harvard.edu) and Mark Bathe [mark.bathe@mit.edu](mailto:mark.bathe@mit.edu)

a

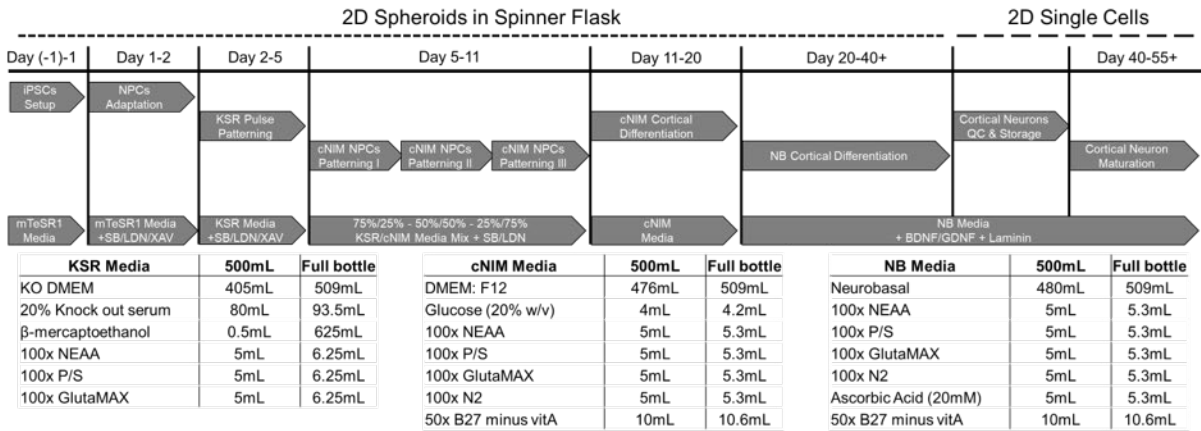

b

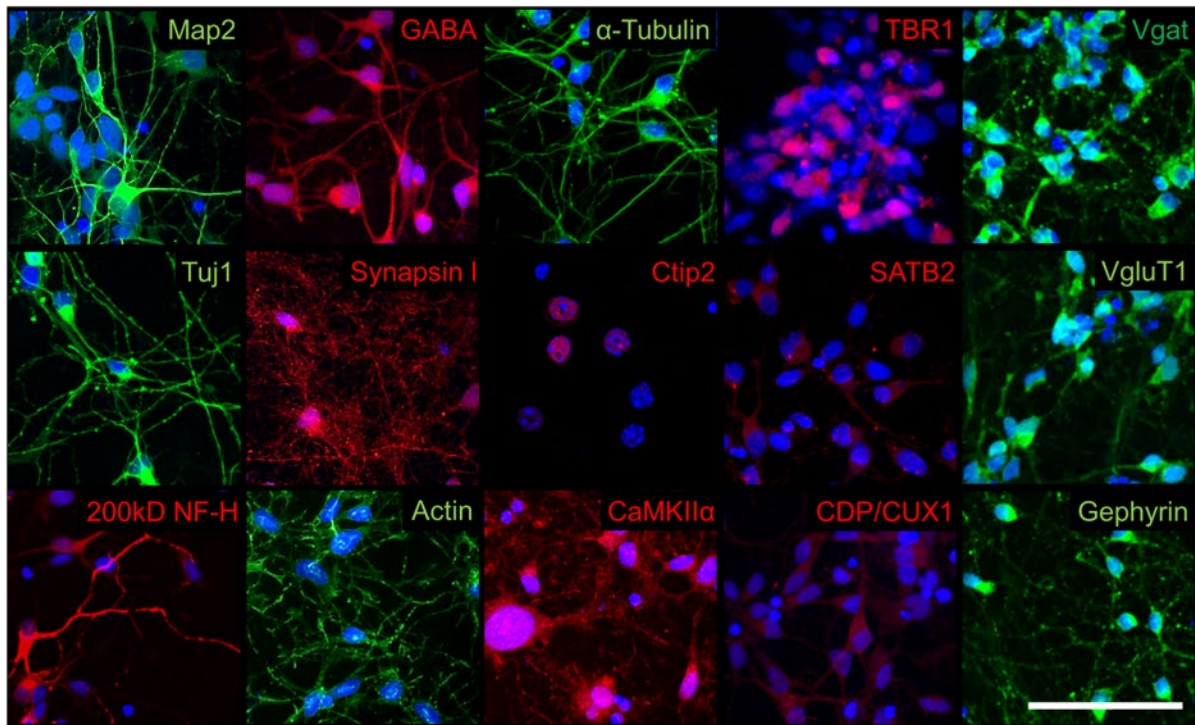

20

21 **Supplementary Figure 1: Directed differentiation towards mature iPSC-derived cortical**  
 22 **neurons, utilizing the spinner flask platform. (a) Schematic of cortical differentiation *in vitro*,**  
 23 **with highlighted important milestones within the protocol. (b) A selection of markers used to**  
 24 **characterize the cultures and confirm mature cortical commitment. Scale bar is 100 microns.**

25

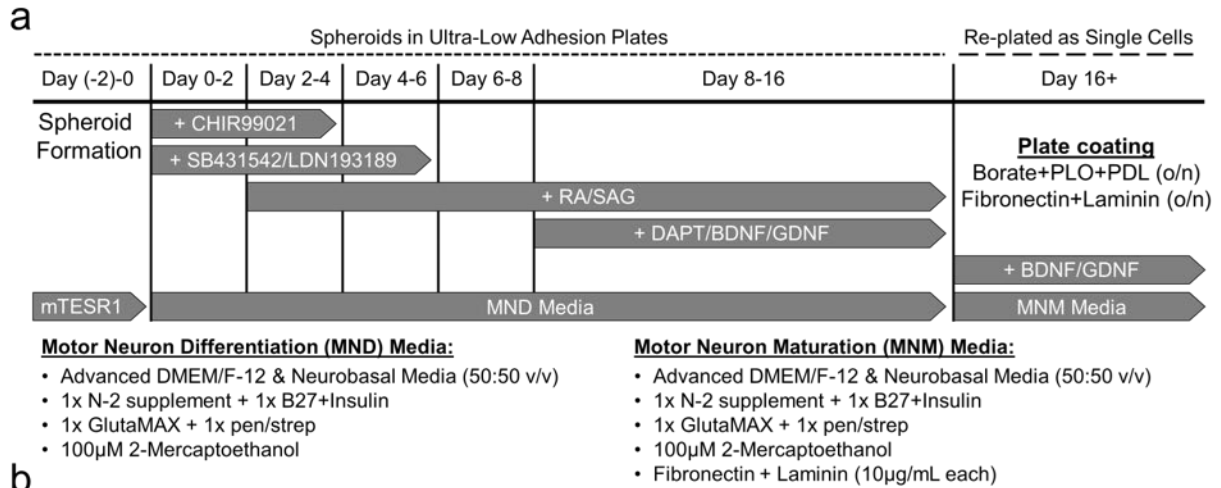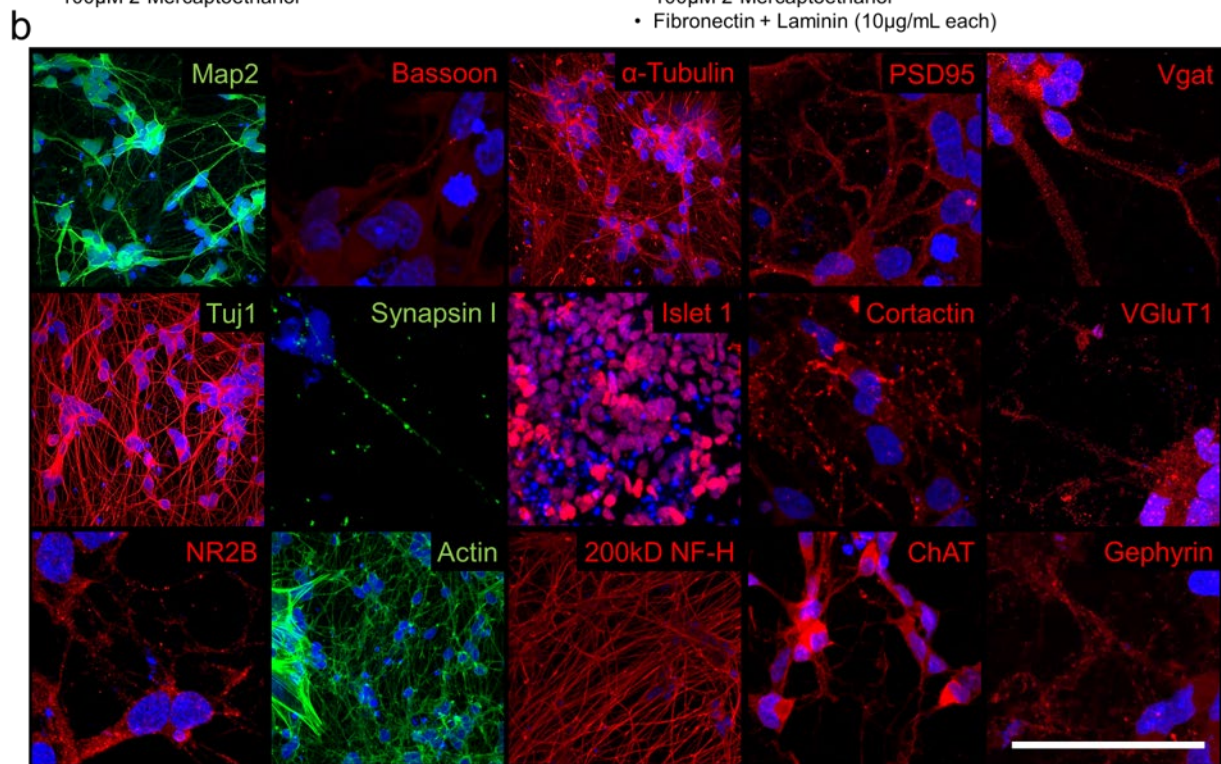

26

27 **Supplementary Figure 2: Directed differentiation towards mature iPSC-derived motor**  
 28 **neurons, utilizing the spinner flask platform. (a)** Schematic of motor neuron differentiation *in*  
 29 *vitro*, with highlighted important milestones within the protocol. **(b)** A selection of markers used to  
 30 characterize the cultures and confirm motor neuron commitment. Scale bar is 50 microns.

a

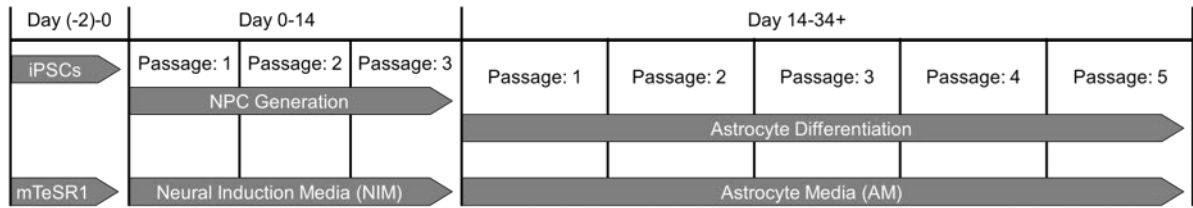

b

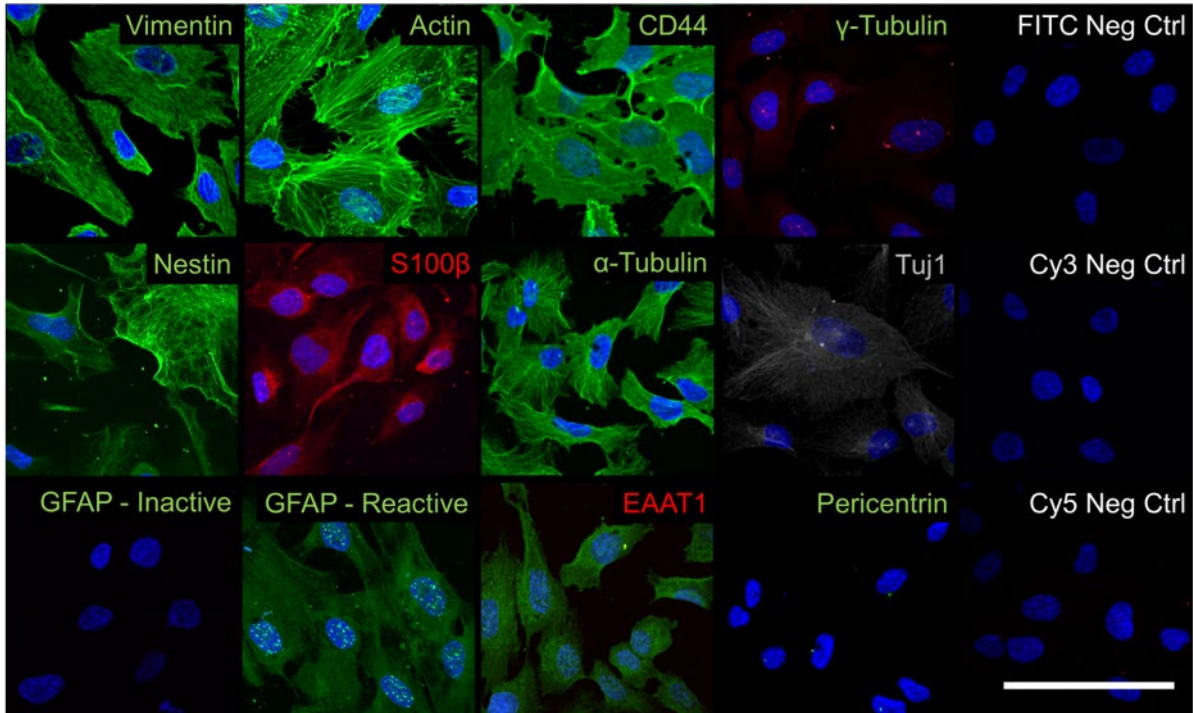

32

33 **Supplementary Figure 3: Directed differentiation towards mature iPSC-derived astrocytes,**  
 34 **utilizing the spinner flask platform. (a) Schematic of astrocyte differentiation *in vitro*, with**  
 35 **highlighted important milestones within the protocol. (b) A selection of markers used to**  
 36 **characterize the cultures and confirm astrocyte differentiation. Scale bar is 50 microns.**

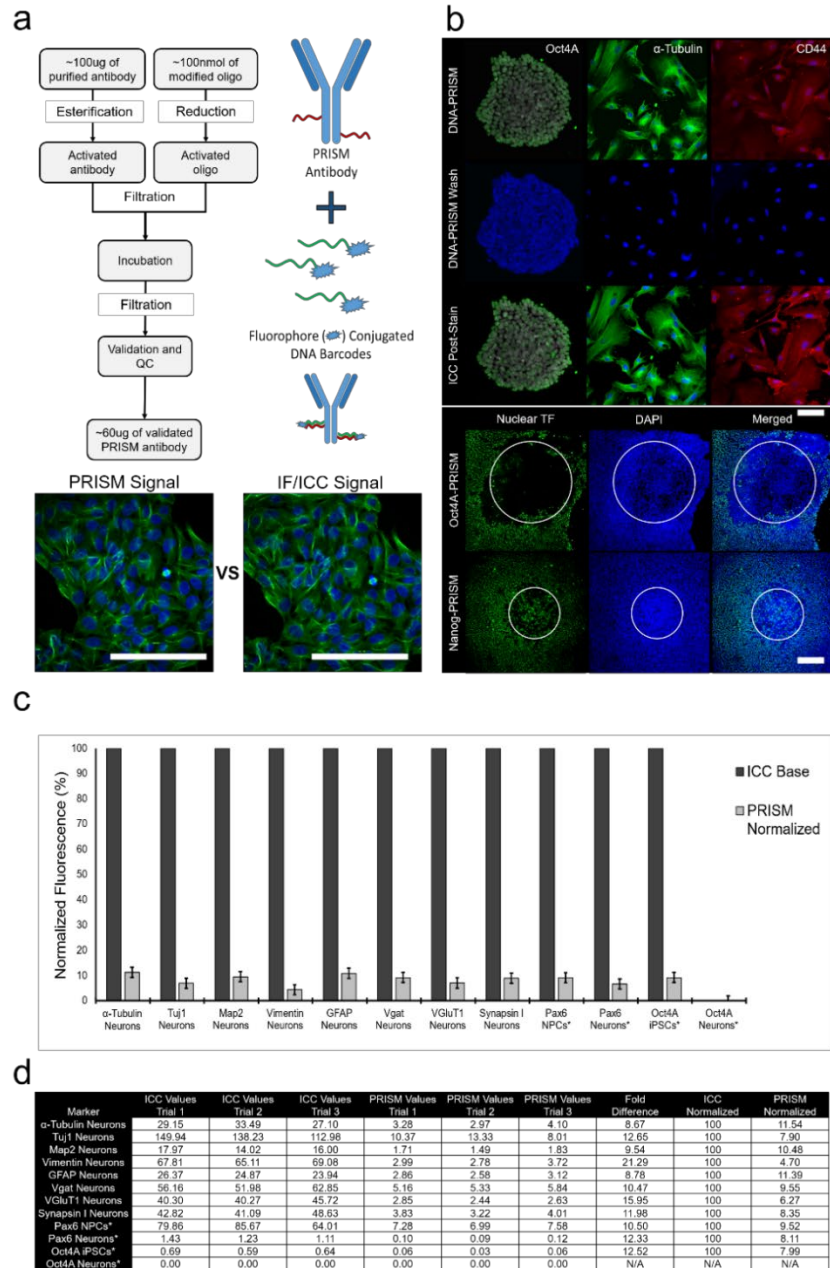

38 **Supplementary Figure 4: Highlights of the generation and validation of high content PRISM**  
 39 **antibody platform, compared to traditional IF/ICC fluorescence. (a)** PRISM antibody  
 40 generation of commercially available antibodies and PRISM-based IF/ICC data generation,  
 41 including a representative comparison of  $\alpha$ -tubulin fluorescent readouts. **(b)** PRISM validation by  
 42 comparing to IF/ICC staining in three major cell compartments, including several stem cell nuclear  
 43 transcription factors in pure pluripotent cultures (top) and in mixed pluripotent and differentiating  
 44 cultures (bottom), where the Oct4A and Nanog signals are decreased or gone (circled). **(c)**  
 45 Normalized fluorescence yield of PRISM markers compared to IF/ICC controls, normalized to  
 46 100% based on IF/ICC signal, in the same culture across the full validated marker panel (Standard  
 47 Error of Mean shown; n=3). **(d)** Individual fluorescence points are shown in the table. Scale bars  
 48 are 50 microns.

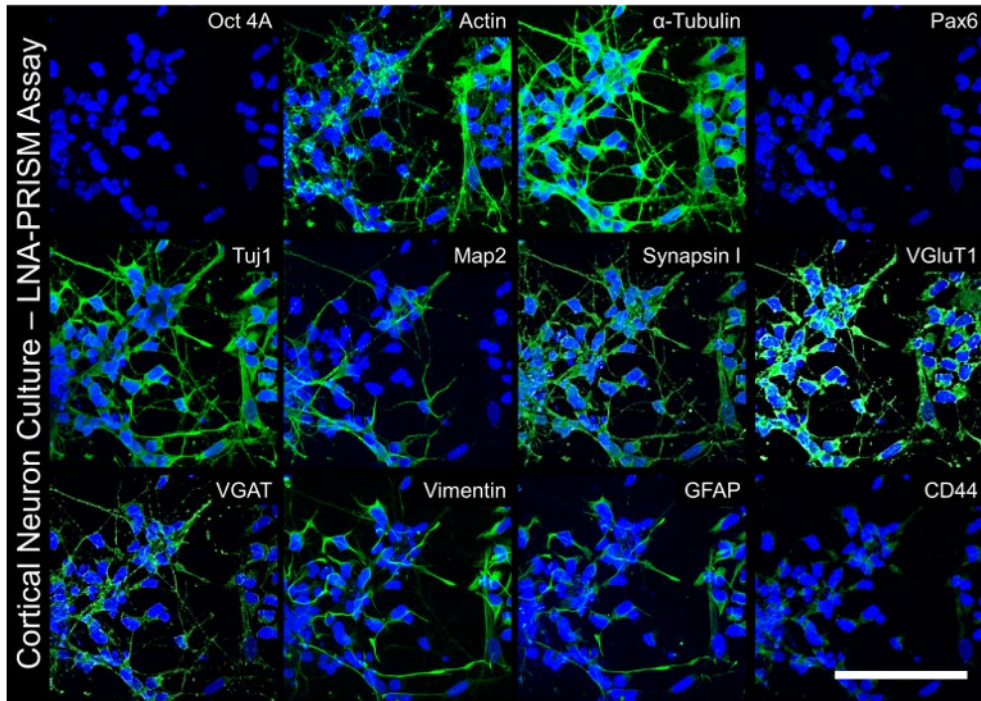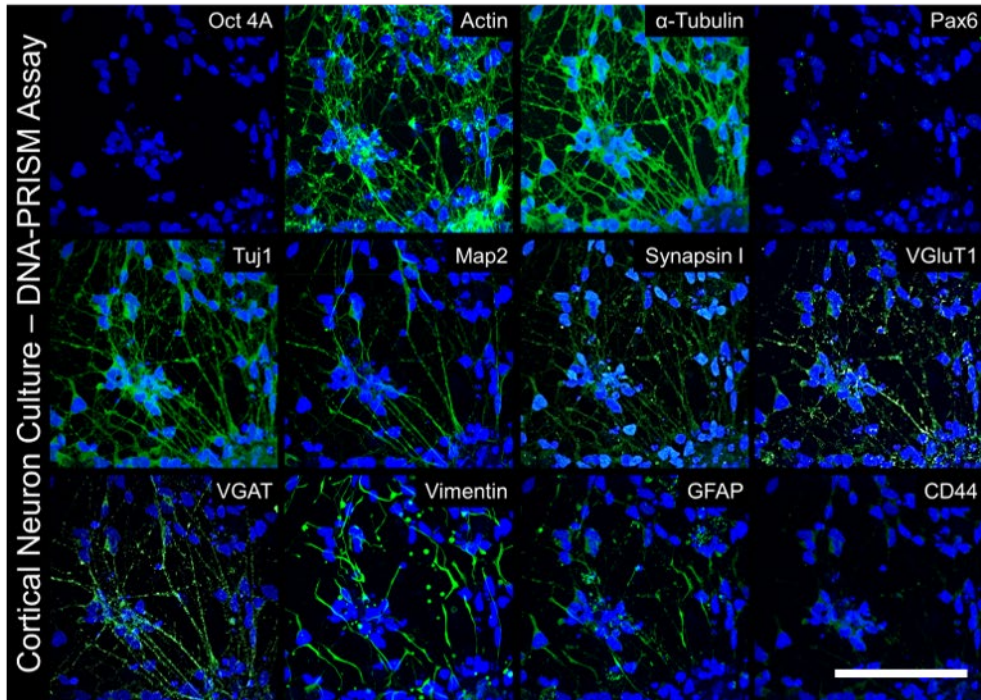

49 **Supplementary Figure 5: Both LNA-PRISM and DNA-PRISM imager strands can generate**  
 50 **high-content data in 2D dissociated human cortical neurons derived from iPSCs.** Staining  
 51 comparison between the LNA imager strand set and the same antibodies conjugated to work with  
 52 the DNA imager strand set. Cells were counterstained with DAPI and Phalloidin488. The PRISM  
 53 marker staining sequence was Tuj1 >  $\alpha$ -Tubulin > Map2 > Synapsin I > Vimentin > VGlut1 > Pax6  
 54 > GFAP > VGAT > Oct4A > CD44 for both the DNA-PRISM and LNA-PRISM antibodies. Scale  
 55 bars are 100 microns.

a

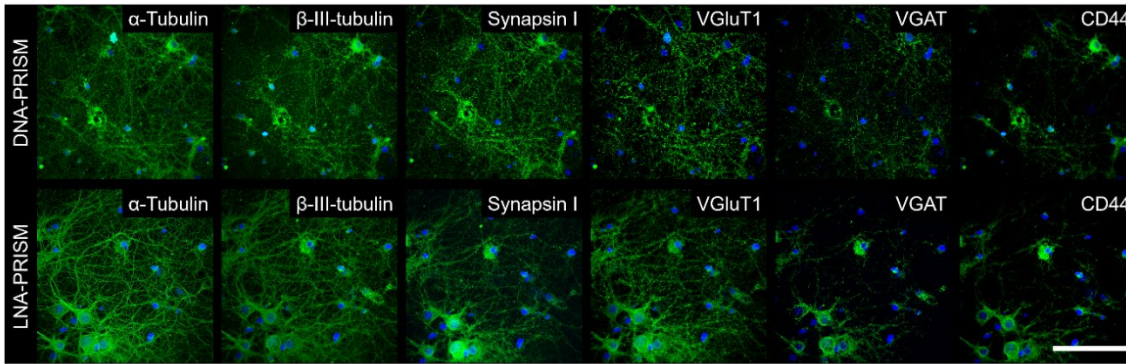

b

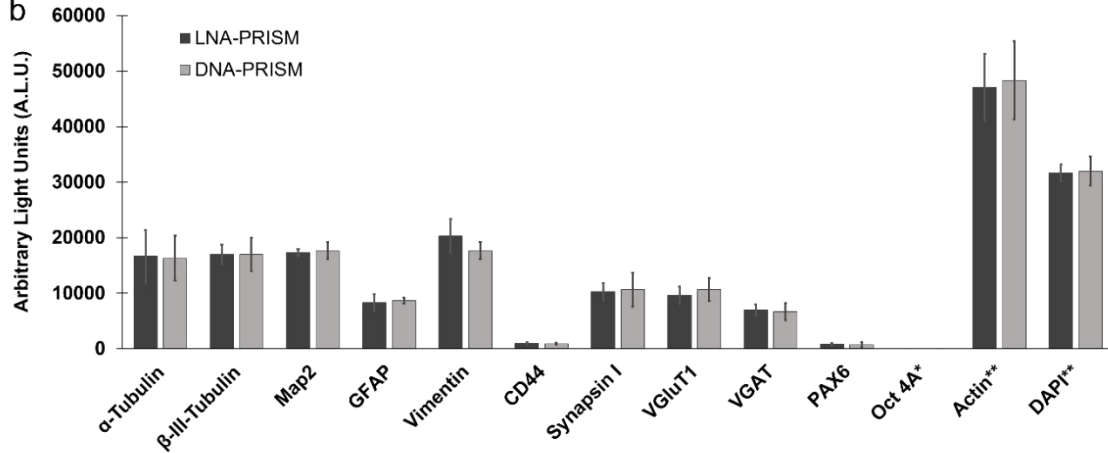

c

| Marker        | ALU 1 (Fuji) |           | ALU 2 (Fuji) |           | ALU 3 (Fuji) |           | ALU Average (Fuji) |           | Std Dev. LNA | Std Dev. DNA |
|---------------|--------------|-----------|--------------|-----------|--------------|-----------|--------------------|-----------|--------------|--------------|
|               | LNA-PRISM    | DNA-PRISM | LNA-PRISM    | DNA-PRISM | LNA-PRISM    | DNA-PRISM | LNA-PRISM          | DNA-PRISM |              |              |
| α-Tubulin     | 22000        | 14000     | 15000        | 21000     | 15000        | 14000     | 16666.67           | 16333.33  | 4725.82      | 4041.45      |
| β-III-Tubulin | 19000        | 17000     | 16000        | 14000     | 16000        | 20000     | 17000.00           | 17000.00  | 1732.05      | 3000.00      |
| Map2          | 17000        | 18000     | 17000        | 19000     | 18000        | 18000     | 17333.33           | 17666.67  | 577.35       | 1527.53      |
| GFAP          | 8000         | 9000      | 7000         | 9000      | 10000        | 8000      | 8333.33            | 8666.67   | 1527.53      | 577.35       |
| Vimentin      | 23000        | 16000     | 21000        | 19000     | 17000        | 18000     | 20333.33           | 17666.67  | 3055.05      | 1527.53      |
| CD44          | 1000         | 900       | 1200         | 1100      | 900          | 700       | 1033.33            | 900.00    | 152.75       | 200.00       |
| Synapsin I    | 10000        | 8000      | 9000         | 14000     | 12000        | 10000     | 10333.33           | 10666.67  | 1527.53      | 3055.05      |
| VGLuT1        | 8000         | 10000     | 10000        | 9000      | 11000        | 13000     | 9666.67            | 10666.67  | 1527.53      | 2081.67      |
| VGAT          | 7000         | 8000      | 8000         | 7000      | 6000         | 5000      | 7000.00            | 6666.67   | 1000.00      | 1527.53      |
| PAX6          | 600          | 400       | 800          | 600       | 1000         | 1200      | 800.00             | 733.33    | 200.00       | 416.33       |
| Oct 4A*       | 0            | 0         | 0            | 0         | 0            | 0         | 0.00               | 0.00      | 0.00         | 0.00         |
| Actin**       | 40000        | 41000     | 50000        | 49000     | 51000        | 55000     | 47000.00           | 48333.33  | 6082.76      | 7023.77      |
| DAPI**        | 32000        | 31000     | 30000        | 30000     | 33000        | 35000     | 31666.67           | 32000.00  | 1527.53      | 2645.75      |

56  
 57 **Supplementary Figure 6: LNA (Locked Nucleic Acid)-PRISM intensity compared to**  
 58 **optimized DNA-PRISM intensity shows comparable fluorescence readouts based on the**  
 59 **Arbitrary Light Units (A.L.U.) on the same microscope.** Representative IF images of rat cortical  
 60 neurons are shown in the top panel, covering the major cell areas that are used in this paper for  
 61 cortical culture characterization. Signal strength comparisons between LNA-PRISM and DNA-  
 62 PRISM imaging strands was done on three different confocal microscopes (ImageXpress,  
 63 Molecular Devices; Opera Phenix, PerkinElmer; C2+ modified manual confocal system, NIKON)  
 64 and at least three independent staining experiments. Oct 4A staining (\*) was not detected since  
 65 there are no pluripotent stem cells left at the time of culture evaluation in either differentiated  
 66 human iPSC-derived cortical cultures, or in dissociated rat/mouse cortical cultures. Actin and  
 67 nuclear staining (\*\*) were done using commercially available reagents – Phalloidin488 for actin  
 68 and DAPI for nuclear counter-staining. Bottom panel graph used A.L.U. values averaged across  
 69 three independent experiments, done on the same microscope (Opera Phenix; PerkinElmer).  
 70 Error bars show SEM values (no statistically significant differences between the LNA and DNA  
 71 signal for each pair of analogous stainings). Raw values are shown in the table. Scale bar is 100  
 72 microns.

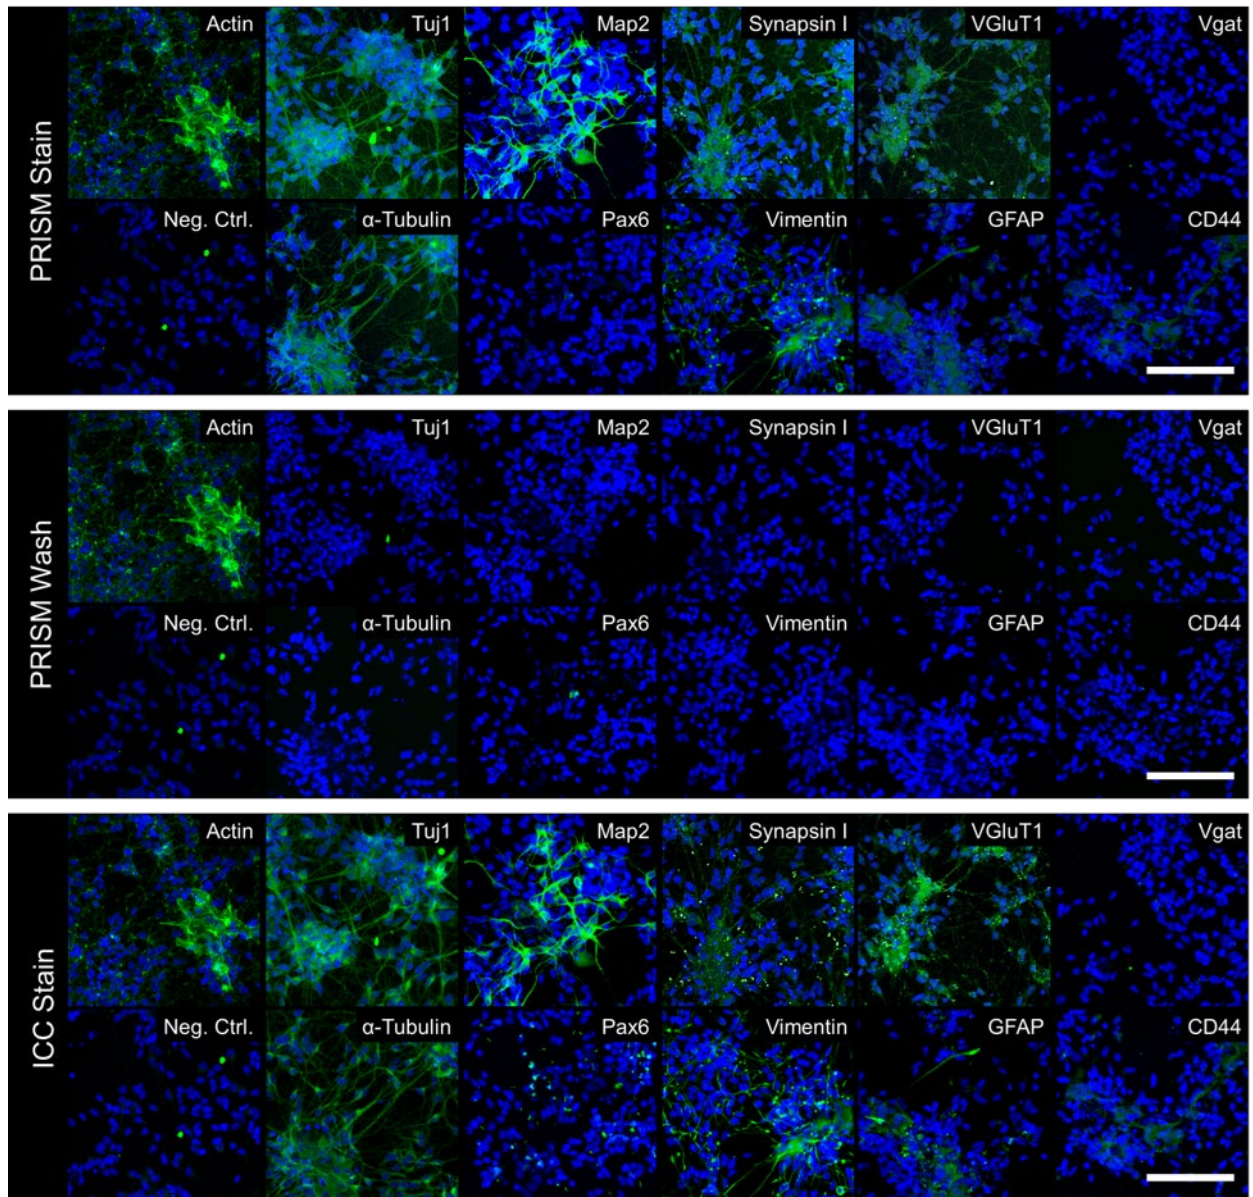

74  
 75 **Supplementary Figure 7: Comparison between ICC staining and PRISM staining in human**  
 76 **iPSC-derived cortical neurons, dissociated into 2D culture and maintained for 14 days *in***  
 77 ***vitro*.** Representative IF staining with the PRISM characterization panel using the full selection of  
 78 cortical markers. Comparing traditional antibody-antibody staining (ICC Stain) versus our  
 79 conjugated antibody platform (PRISM Stain), while residual signal left after the low salt buffer wash  
 80 is shown in the (Post-Stain) panel for each conjugated antibody. To generate the control ICC  
 81 signal, each culture was first stained with the PRISM antibodies, nine positions were marked and  
 82 imaged for each marker. The cultures were then washed and stained with regular secondary  
 83 antibodies against the primary, then the same areas were imaged again. Representative images  
 84 shown in this figure are from 6 different staining runs. Pax 6 staining with the PRISM antibody was  
 85 subject to sensitivity issue. Scale bars are 100 microns.



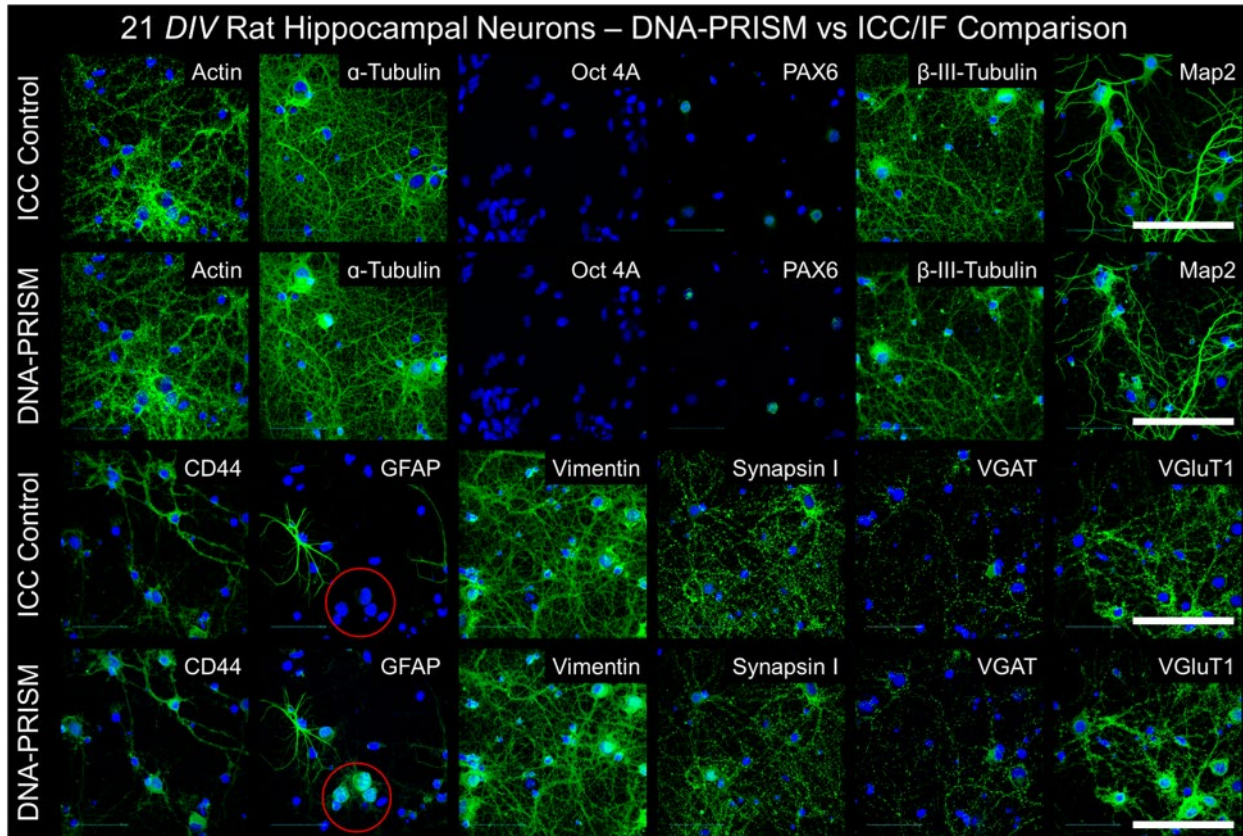

86  
87 **Supplementary Figure 8: Comparison between ICC staining and DNA-PRISM staining in rat**  
88 **hippocampal neurons, dissociated into 2D culture and maintained for 21 days *in vitro* (DIV).**  
89 Representative immunofluorescent staining with the PRISM characterization panel using the full  
90 selection of cortical markers. Comparing traditional antibody-antibody staining (ICC Control)  
91 versus our conjugated antibody platform (DNA-PRISM) suggests very high correlation between  
92 the readouts in all, but the GFAP marker, where there is a subset of aberrant staining artefacts  
93 (circled in red). This might be due to this specific antibody not being validated to work in rat  
94 dissociated cultures. Importantly, the staining patterns for human (shown in this paper) and mouse  
95 (data not shown) cortical neurons, which are both validated by the manufacturer, are almost  
96 identical between control ICC and our PRISM readouts. Representative data shown in this figure  
97 from 4 independent staining runs. Scale bars are 100 microns.

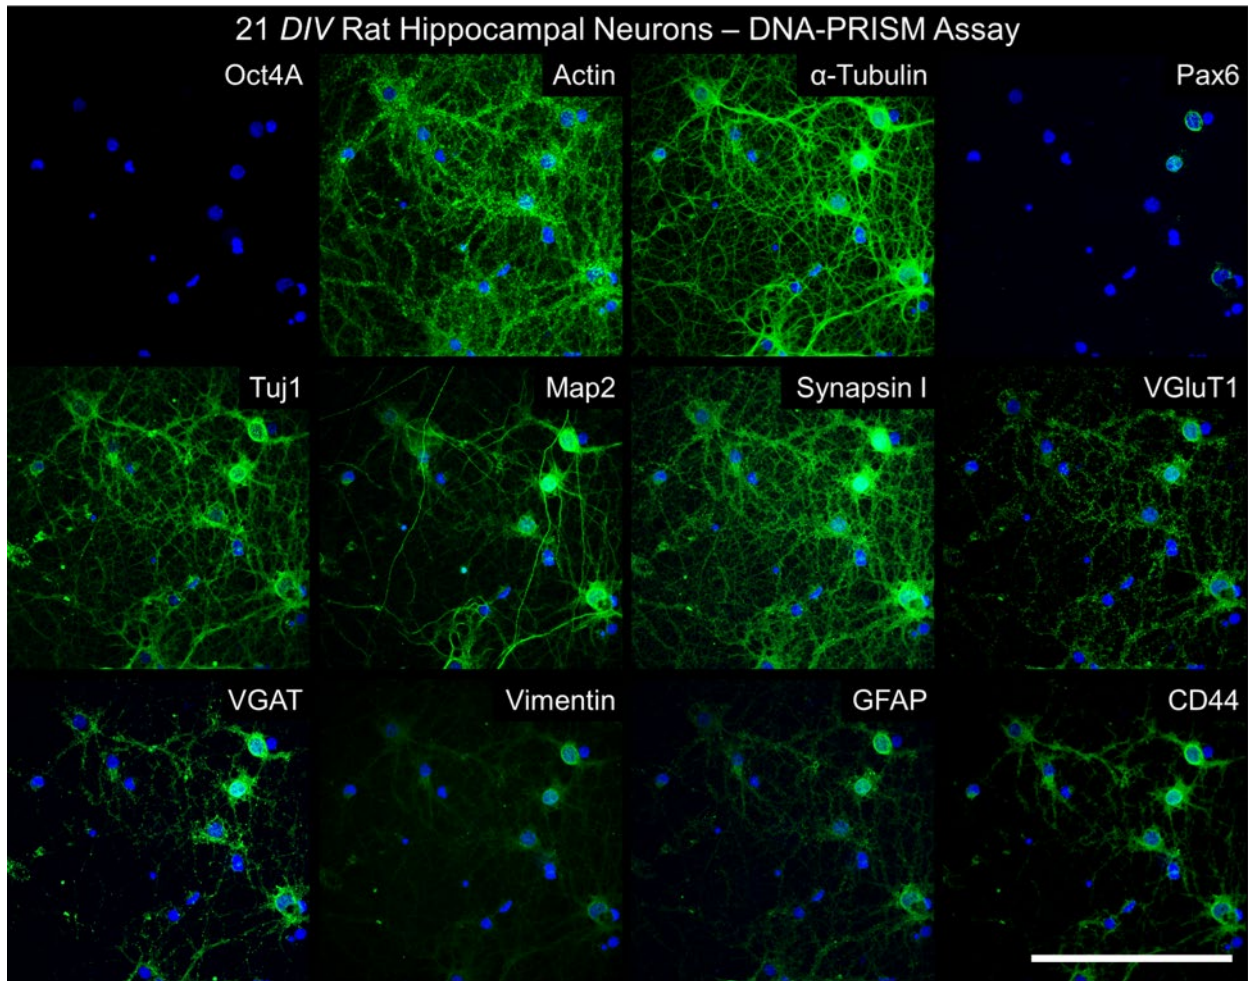

99  
 100 **Supplementary Figure 9: DNA-PRISM antibodies can generate high-content data in 2D**  
 101 **dissociated rat hippocampal neurons cultures.** Representative immunofluorescent staining  
 102 with the PRISM characterization panel using the full selection of cortical markers and DNA-based  
 103 imager strands. The GFAP and Vimentin markers in our panel were selected and optimized to  
 104 work in human cortical cultures, so they exhibit some staining aberrations when used in rat  
 105 cultures. Scale bars are 100 microns.

a

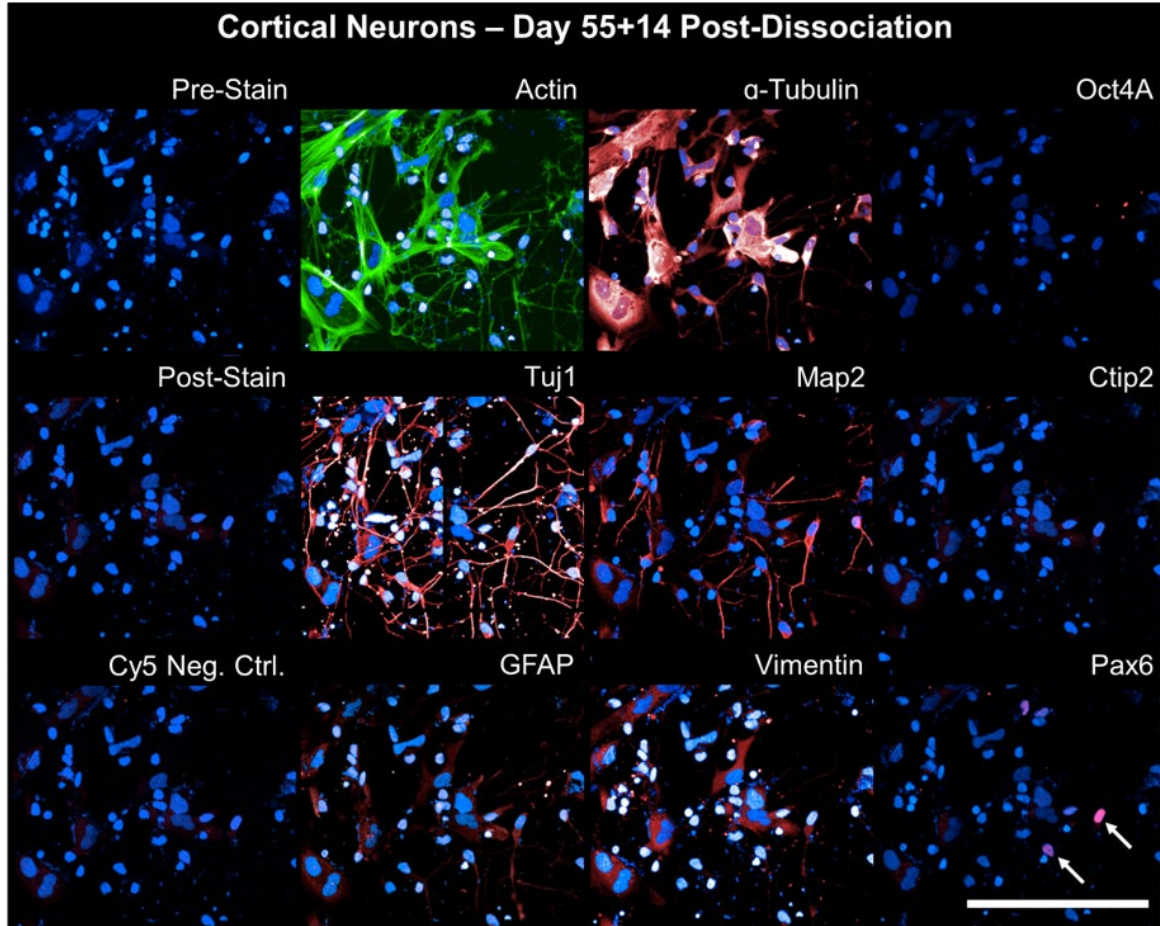

b

Manual Assay (~133 hours/plate)

Automated Assay (~43 hours/plate)

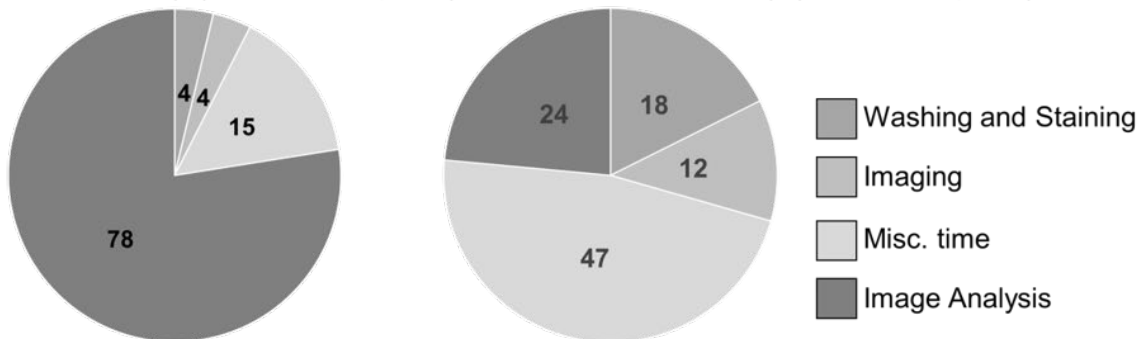

107  
 108 **Supplementary Figure 10: Automated PRISM staining and imaging generates comparable**  
 109 **outputs to manual assays, with a significant increase of the depth of analysis and a**  
 110 **decrease in required run times (a) Representative images generated in cortical neural cultures**  
 111 **using an abridged PRISM panel on the PerkinElmer Phenix. (b) Comparison of percent time spent**  
 112 **between a representative manual assay analysis versus an automated pipeline for a single 96-**  
 113 **well plate. Automating the PRISM assay is on average three times faster compared to a manual**  
 114 **assay. Scale bars is 100 microns.**

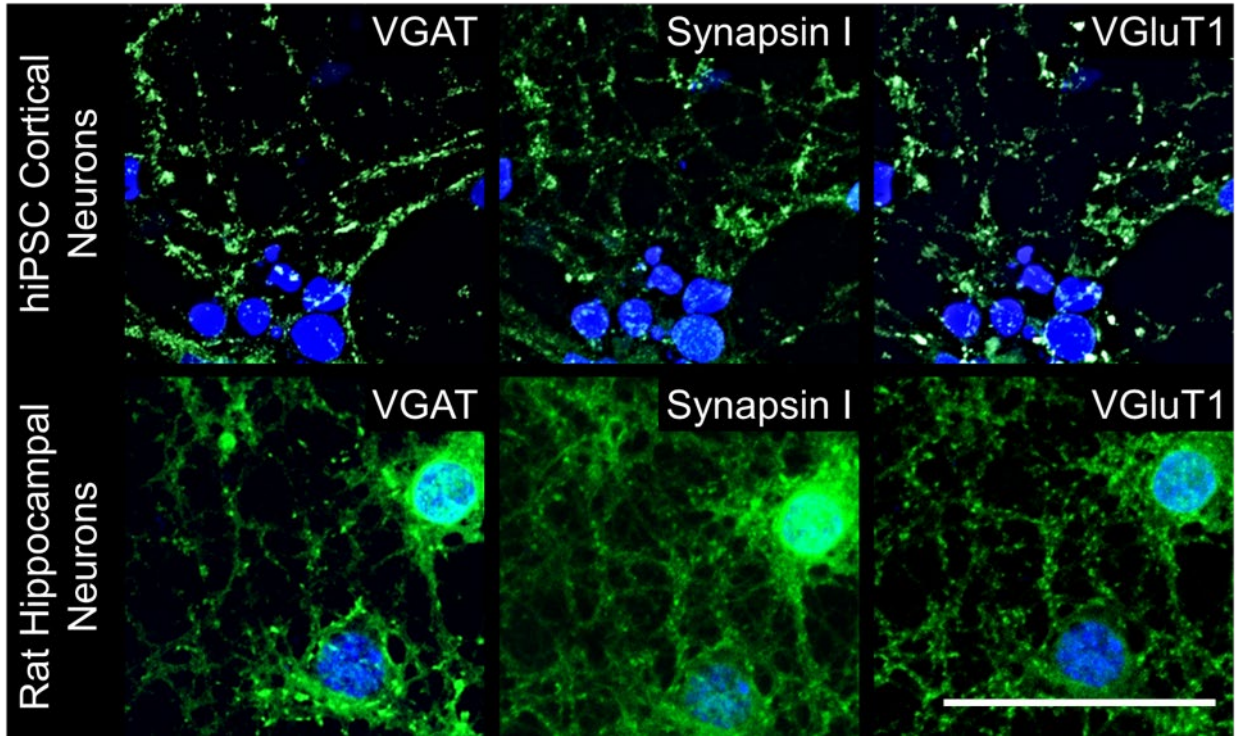

115  
116 **Supplementary Figure 11: Zoom-in on synaptic markers stained with DNA-PRISM**  
117 **antibodies.** Representative images of three synaptic markers stained in stem cell derived cortical  
118 neurons and in dissociated rat hippocampal neurons. Images were taken in the same field of view  
119 in cultures that were fixed at 14 days post-seeding. Scale bar is 25 microns.

120

121

|                           |                 |             |         |     |       |                           |               |             |        |     |       |
|---------------------------|-----------------|-------------|---------|-----|-------|---------------------------|---------------|-------------|--------|-----|-------|
| GFAP                      | RnD Systems     | AF2594      | sheep   | Yes | Yes   | Cortactin                 | Novus         | NBP2-15971  | rabbit | Yes | Maybe |
| GFAP                      | Abcam           | ab190288    | mouse   | Yes | No    | ChAT                      | Abcam         | ab181023    | rabbit | Yes | Yes   |
| Nestin                    | RnD Systems     | MAB1259     | mouse   | Yes | Yes   | Pax6                      | ThermoFisher  | 42-6600     | rabbit | Yes | Yes   |
| Nestin                    | ThermoFisher    | MA1-110     | mouse   | Yes | Yes   | SOX2                      | RnD Systems   | MAB2018     | mouse  | Yes | Yes   |
| Nestin                    | Abcam           | ab22035     | mouse   | Yes | Yes   | ZO-1                      | ThermoFisher  | 61-7300     | rabbit | Yes | Yes   |
| Vimentin                  | RnD Systems     | MAB2105     | rat     | Yes | Yes   | SSEA1                     | RnD Systems   | MAB2155     | mouse  | Yes | Yes   |
| Vimentin                  | RnD Systems     | AF2105      | goat    | Yes | No    | SOX1                      | Abcam         | ab87775     | rabbit | Yes | Yes   |
| Vimentin [V9]             | ThermoFisher    | MA5-11883   | mouse   | Yes | Yes   | Nanog                     | ThermoFisher  | PA1-097     | rabbit | Yes | Yes   |
| Vimentin                  | Abcam           | ab92547     | rabbit  | Yes | Yes   | E-Cadherin                | ThermoFisher  | 13-1700     | mouse  | Yes | Yes   |
| CD44                      | RnD Systems     | AF6127      | sheep   | Yes | No    | SSEA4                     | ThermoFisher  | MA1-021     | mouse  | Yes | Yes   |
| CD44                      | Novus           | NBP1-47386  | mouse   | Yes | Yes   | Oct-3/4A                  | RnD Systems   | MAB1759     | rat    | Yes | Yes   |
| CD44                      | Abcam           | ab15707     | rabbit  | Yes | Yes   | $\alpha$ -Tubulin [TU-01] | ThermoFisher  | MA1-19162   | mouse  | Yes | Yes   |
| GLAST/EAAT1               | Abcam           | ab416       | rabbit  | Yes | Yes   | $\alpha$ -Tubulin [TU-01] | ThermoFisher  | 13-8000     | mouse  | Yes | Yes   |
| S100-beta                 | Abcam           | ab52642     | rabbit  | Yes | Yes   | $\alpha$ -Tubulin [DM1a]  | Sigma Aldrich | T6199-200ul | mouse  | Yes | No    |
| TBR1                      | Abcam           | ab31940     | rabbit  | Yes | Yes   | $\alpha$ -Tubulin [DM1a]  | Abcam         | ab7291      | mouse  | Yes | Yes   |
| Clp2                      | Abcam           | ab18465     | rat     | Yes | Yes   | $\alpha$ -Tubulin [DM1a]  | Novus         | NB100-690   | mouse  | Yes | Yes   |
| MAP2                      | Novus           | NB300-213   | chicken | Yes | Yes   | $\gamma$ -Tubulin         | Abcam         | ab11316     | mouse  | Yes | Yes   |
| MAP2                      | Novus           | NB100-98717 | sheep   | Yes | No    | Pericentrin               | Abcam         | ab4448      | rabbit | Yes | Yes   |
| $\beta$ -III-Tubulin/Tuj1 | Sigma Aldrich   | T5076-200ul | mouse   | Yes | Yes   | Actin/Phalloidin488       | ThermoFisher  | A12379      | -      | Yes | Yes   |
| $\beta$ -III-Tubulin/Tuj1 | Novus           | NB100-1612  | chicken | Yes | No    | Actin/Phalloidin568       | ThermoFisher  | A12380      | -      | Yes | Yes   |
| SATB2                     | Abcam           | ab51502     | mouse   | Yes | Yes   | Actin/Phalloidin598       | ThermoFisher  | A12381      | -      | Yes | Yes   |
| CDP/CUTL1/CUX1            | Pierce Chemical | PA525788    | rabbit  | Yes | Yes   | Actin/Phalloidin660       | ThermoFisher  | A22285      | -      | Yes | Yes   |
| Synapsin I                | Abcam           | ab64581     | goat    | Yes | Yes   | Donkey anti-Guinea Pig    | Jackson       | 706-005-148 | -      | Yes | Yes   |
| GABA B1 Receptor          | Abcam           | ab55051     | mouse   | Yes | Yes   | Donkey anti-Chicken       | ThermoFisher  | SA1-72002   | -      | Yes | Yes   |
| 200kD Neurofilament       | Novus           | AF3108      | goat    | Yes | No    | Donkey anti-Chicken       | Rockland      | 603-701-C37 | -      | Yes | Yes   |
| 200kD Neurofilament       | Novus           | NBP1-97726  | mouse   | Yes | Yes   | Donkey anti-Mouse         | ThermoFisher  | A16019      | -      | Yes | Yes   |
| CaMKII-alpha              | Abcam           | ab54925     | mouse   | Yes | Maybe | Donkey anti-Rabbit        | ThermoFisher  | A16037      | -      | Yes | Yes   |
| VGluT1                    | ThermoFisher    | 48-2400     | rabbit  | Yes | No    | Donkey anti-Goat          | ThermoFisher  | A16007      | -      | Yes | Yes   |
| Vgat                      | Novus           | MAB6847     | mouse   | Yes | Yes   | Donkey anti-Rat           | ThermoFisher  | A24545      | -      | Yes | Yes   |
| Gephyrin                  | Abcam           | ab181382    | rabbit  | Yes | Maybe | Donkey anti-Sheep         | ThermoFisher  | A16050      | -      | Yes | Yes   |
| Islet 1                   | RnD Systems     | AF1837      | goat    | Yes | Yes   | DAPI                      | ThermoFisher  | 62248       | -      | Yes | Yes   |
| Islet 1                   | Abcam           | ab109517    | rabbit  | Yes | Yes   |                           |               |             |        |     |       |

122

123 **Supplementary Table 1: Full list of antibodies tested and validated for compatibility with**  
124 **the necessary modifications to generate PRISM antibodies.** Candidate markers that still  
125 maintained their specific recognition sites and staining pattern when compared to the unmodified  
126 version are marked in white, while markers that were inconsistent between conjugation runs are  
127 marked with yellow, and markers that we were unable to convert into PRISM antibodies  
128 successfully are marked in red.

| Marker               | iPSCs | Human NPCs | Human Neurons | Human Glial Cells | Human Radial Glia | Early Astrocytes | Late Astrocytes |
|----------------------|-------|------------|---------------|-------------------|-------------------|------------------|-----------------|
| MAP2                 | -     | -          | +             | -                 | -                 | -                | -               |
| $\beta$ -III-Tubulin | -     | -          | +             | -                 | -                 | -                | -               |
| Vgat                 | -     | -          | +             | -/+               | -                 | -                | -/+             |
| VGluT1               | -     | -          | +             | -/+               | -                 | -                | -/+             |
| Synapsin I           | -     | -          | +             | -/+               | -                 | -                | -/+             |
| Vimentin             | -     | -          | -             | +                 | +                 | +                |                 |
| GFAP                 | -     | -          | -             | +                 |                   | -                | +               |
| CD44                 |       |            |               | +                 |                   |                  | +               |
| PAX6                 | -     | +          | -             |                   | +                 | -                | -               |
| Oct4A                | +     | -          | -             | -                 | -                 | -                | -               |
| $\alpha$ -Tubulin    | +     | +          | +             | +                 | +                 | +                | +               |
| Actin                | +     | +          | +             | +                 | +                 | +                | +               |
| Hoechst              | +     | +          | +             | +                 | +                 | +                | +               |

129

130 **Supplementary Table 2: List of PRISM antibodies that allow for extensive and parallel**  
131 **neural culture characterization.** Curated panel that is able to analyze complex cortical and motor  
132 neuron cultures, both as healthy controls as well as in disease modeling, while also maintaining  
133 the flexibility to evaluate other neural culture types and states with minimal modifications. Human  
134 glia cells could be seen as expressing synaptic markers (-/+), due to their role in harvesting and  
135 recycling these in neural co-culture

136

| <b>PRISM Staining Protocol</b>                 |                                                                                             |
|------------------------------------------------|---------------------------------------------------------------------------------------------|
| <b>1. Fixation</b>                             | 4% Paraformaldehyde in 1xPBS for 15min at room temperature (RT)                             |
| <b>2. Paraformaldehyde Quench</b>              | 100mM Glycine in ddH <sub>2</sub> O for 10min at RT                                         |
| <b>3. Permeabilization</b>                     | 0.2% TritonX-100 in 1xPBS for 15min at RT                                                   |
| <b>4. Wash</b>                                 | 2x5min with 1xPBS at RT                                                                     |
| <b>5. Blocking I</b>                           | 1x PBS + 1:100 RNase A1 and RNase T1 Cocktail for 30min at RT                               |
| <b>6. Blocking II</b>                          | 2% BSA in 1xPBS (w/v) + 1mg/ml salmon sperm DNA for 1 hour at 4°C                           |
| <b>7. Wash</b>                                 | 2x5min with 1xPBS at room temperature                                                       |
| <b>8. Primary Antibody Addition</b>            | Primary antibodies added at 1:200 concentration & incubated at 4°C o/n                      |
| <b>9. Wash</b>                                 | 2x5min with 1xPBS at room temperature                                                       |
| <b>10. PRISM Secondary Antibodies Addition</b> | Secondary conjugated antibodies added at 1:200 concentration and incubated at 4°C overnight |
| <b>11. Wash</b>                                | 2x5min with PRISM Wash Buffer at RT                                                         |
| <b>12. PRISM Primary Antibodies Addition</b>   | Primary conjugated antibodies added at 1:100 concentration and incubated at 4°C overnight   |
| <b>13. Wash</b>                                | 2x5min with PRISM <u>Wash Buffer</u> at RT                                                  |
| <b>14. Nuclear &amp; Phalloidin Staining</b>   | 1:200 DAPI (1mg/ml) and 1:200 Ph488 Added and incubated for 1 hour at RT                    |
| <b>15. Wash</b>                                | 2x5min with 1xPBS at RT and image as soon as possible                                       |
| <b>16. Add a PRISM Imaging Strand</b>          | Add 10-20nM imager strand in <u>Imaging Buffer</u> and incubate at RT for 10min.            |
| <b>17. Image Sample</b>                        | Wash cells once in <u>Imaging Buffer</u> , keep them in this buffer and image sample        |
| <b>18. Wash</b>                                | 3x5min incubation in <u>Wash Buffer</u> at RT                                               |
| <b>19. Cycle PRISM Imaging</b>                 | Cycle through steps 15-17 until all markers are imaged                                      |
| <b>20. Data Analysis</b>                       | Post-Acquisition processing and analysis in CellProfiler and/or FIJI                        |

#### **DNA-PRISM-Specific Buffers**

##### Blocking Buffer (1xPBS + 2% BSA; v/w)

- 50ml 1xPBS
- 1g BSA
- 500ul 100x pen/strep
- Store at 4°C
- **Just before blocking:**
  - Add ssDNA to 1mg/ml final conc.

##### Imaging Buffer (500mM NaCl in 1xPBS)

- 50mL of 1xPBS
- 1.46g of NaCl
- **Adjust pH to ~8.0**
- Store at room temperature

##### Wash Buffer (0.01x PBS)

- 50mL of ddH<sub>2</sub>O
- 500μL of 1x PBS
- Store at room temperature

137

138 **Supplementary Table 3: Detailed outline on DNA-PRISM staining protocol.** Steps and  
 139 explanations starting from cell fixation all the way to the post-acquisition data processing, including  
 140 the PRISM-specific buffers that are required to cycle imager strands to generate the 12 marker  
 141 neural panel images.

| <b>Cortical Neuron Differentiation Protocol</b> |                                                                                                                                                                                                                                     |                                                                                                                                    |
|-------------------------------------------------|-------------------------------------------------------------------------------------------------------------------------------------------------------------------------------------------------------------------------------------|------------------------------------------------------------------------------------------------------------------------------------|
| <b>Protocol Step</b>                            | <b>Step Details</b>                                                                                                                                                                                                                 | <b>Notes</b>                                                                                                                       |
| Adapt iPSCs for Cortical Differentiation        | Seed single cell dissociated iPSCs into a spinner flask in mTeSR1 media supplemented with 10 $\mu$ M ROCKi for 2 days.                                                                                                              | Dissociate iPSC colonies with UltraPure 500 $\mu$ M EDTA for 10min at 37°C.                                                        |
| mTeSR1 NPC Adaptation                           | Supplement mTeSR1 media with SB (10 $\mu$ M), LDN (1 $\mu$ M), and XAV939 (2 $\mu$ M) small molecules for 1 day.                                                                                                                    | Full media change. Prepare the mTeSR1-based differentiation media immediately prior to use.                                        |
| KSR Pulse & Neural Patterning                   | Supplement KSR Pulse media with SB (10 $\mu$ M), LDN (1 $\mu$ M), and XAV939 (2 $\mu$ M) small molecules for 3 days.                                                                                                                | Do one full media change after 24 hours, then keep cells in KSR Pulse media for 48 hours.                                          |
| cNIM Adaptation & Neural Patterning I           | Mix KSR Pulse media with cNIM media at 75/25 and supplement it with SB (10 $\mu$ M) and LDN (1 $\mu$ M). Incubate for 2 days.                                                                                                       | Full media changes every 2 days. Prepare media mix immediately prior to use.                                                       |
| cNIM Adaptation & Neural Patterning II          | Mix KSR Pulse media with cNIM media at 50/50 and supplement it with SB (10 $\mu$ M) and LDN (1 $\mu$ M). Incubate for 2 days.                                                                                                       | Full media changes every 2 days. Prepare media mix immediately prior to use.                                                       |
| cNIM Adaptation & Neural Patterning III         | Mix KSR Pulse media with cNIM media at 25/75 and supplement it with SB (10 $\mu$ M) and LDN (1 $\mu$ M). Incubate for 2 days.                                                                                                       | Full media changes every 2 days. Prepare media mix immediately prior to use.                                                       |
| cNIM Cortical Differentiation                   | Incubate cultures in cNIM media for 9 days.                                                                                                                                                                                         | Full media changes every 3 days. Full cNIM media can be stored at 4°C for the duration.                                            |
| NB Cortical Differentiation                     | Incubate cultures in NB media supplemented with BDNF (10ng/mL) and GDNF (10ng/mL) for 20+ days.                                                                                                                                     | Full media changes every 4 days. Full NB media can be stored at 4°C for the duration.                                              |
| Cortical Neurons QC & Cryo-Storage              | Dissociate cortical spheroids at Day 41+ and freeze down at ~20 million cells/mL, OR use generated cells for downstream applications.                                                                                               | Dissociate spheroids in Trypsin-EDTA for 20min at RT, count cells and record viability.                                            |
| Cortical Neuron 2D Culture Plating              | Seed cortical neurons on poly-D-Lysine (25 $\mu$ g/mL), poly-L-ornithine (25 $\mu$ g/mL), Fibronectin (10 $\mu$ g/mL), and Laminin (10 $\mu$ g/mL) coated plates in NB+BDNF/GDNF (10ng/mL), OR BrainPhys+BDNF/GDNF (20ng/mL) media. | Dilute PDL and PLO in 1X Borate in water. Add 10 $\mu$ M ROCKi to the NB+BDNF/GDNF media and do 50% media change 24 hours later.   |
| NB Cortical Maturation II                       | Maintain 2D cortical cultures in NB+BDNF/GDNF (10ng/mL), OR BrainPhys+BDNF/GDNF (20ng/mL) for 1 week common marker analysis, and for 2+ weeks for synapse formation.                                                                | 50% media changes every 4 days; if keeping long-term cultures, add Laminin (10 $\mu$ g/mL) in the cortical media used once a week. |

142

143 **Supplementary Table 4: Protocol steps, including expanded step details and notes for**  
144 **cortical neuron differentiation using human iPSCs.** Detailed notes include small molecule  
145 concentrations, used in this protocol, as well as comments that improve the efficacy of each step  
146 in this complex differentiation.

147



| <b>Motor Neuron Differentiation Protocol</b>                        |                                                                                                                                                                                              |                                                                                                                                                                |
|---------------------------------------------------------------------|----------------------------------------------------------------------------------------------------------------------------------------------------------------------------------------------|----------------------------------------------------------------------------------------------------------------------------------------------------------------|
| <b>Protocol Step</b>                                                | <b>Step Details</b>                                                                                                                                                                          | <b>Notes</b>                                                                                                                                                   |
| Pluripotent iPSCs Single Cell Dissociation                          | <u>Day -2:</u> Use UltraPure EDTA (500µM) for 10min at 37°C.                                                                                                                                 | Different lines may require adjustment on dissociation time with EDTA.                                                                                         |
| EB/Spheroid Formation                                               | <u>Day -2-0:</u> Seed cells in ultra-low attachment plates in mTESR1 media supplemented with ROCKi (10µM and FGF-2 (20ng/mL).                                                                | Keep forming EBs in this media for 24 hours, then replace with fresh mTESR1 media for 24 hours.                                                                |
| Differentiate Spheroids in Motor Neuron Differentiation (MND) Media | <u>Day 0-2:</u> MND media supplemented with SB431542 (10µM) and LDN193189 (100nM), plus CHIR99021 (3µM).                                                                                     | Collect spheroids in a conical tube and spin them down for 5min at 500rpm before media change.                                                                 |
| Differentiate Spheroids in Motor Neuron Differentiation (MND) Media | <u>Day 2-4:</u> MND media supplemented with SB431542 (10µM) and LDN193189 (100nM), plus CHIR99021 (3µM), RA (1µM) and SAG (1µM).                                                             | Collect spheroids in a conical tube and spin them down for 5min at 500rpm before media change.                                                                 |
| Differentiate Spheroids in Motor Neuron Differentiation (MND) Media | <u>Day 4-6:</u> MND media supplemented with SB431542 (10µM) and LDN193189 (100nM), plus RA (1µM) and SAG (1µM).                                                                              | Collect spheroids in a conical tube and spin them down for 5min at 500rpm before media change.                                                                 |
| Differentiate Spheroids in Motor Neuron Differentiation (MND) Media | <u>Day 6-8:</u> MND media supplemented with RA (1µM) and SAG (1µM).                                                                                                                          | Collect spheroids in a conical tube and spin them down for 5min at 500rpm before media change.                                                                 |
| Differentiate Spheroids in Motor Neuron Differentiation (MND) Media | <u>Day 8-16:</u> MND media supplemented with RA (1µM) and SAG (1µM), supplemented with DAPT (10µM), BDNF and GDNF (20ng/mL each).<br><b>50% media changes every two days</b>                 | Collect spheroids in a conical tube and spin them down for 5min at 500rpm before media change.                                                                 |
| Motor Neuron Spheroids Dissociation to Single Cells                 | <u>Day 16:</u> EBs were then dissociated with a solution 0.25% Trypsin-EDTA and DNase (25µg/mL) until single cells; ~15min at RT.                                                            | Collect spheroids in a conical tube and spin them down for 5min at 500rpm before media change.                                                                 |
| Replate Motor Neurons in Motor Neuron Maturation (MNM) Media        | <u>Day 16:</u> Seed cells on poly-D-Lycine (25µg/mL), poly-L-ornithine (25µg/mL), Fibronectin (10µg/mL), and Laminin (10µg/mL) coated plates in MNM media plus BDNF and GDNF (20ng/mL each). | Coat plates o/n with 1X Borate in water plus poly-L-ornithine (25µg/mL), wash 3x with PBS, then coat o/n with 1xPBS plus Fibronectin & Laminin (10µg/mL each). |
| Mature Motor Neurons in Motor Neuron Maturation (MNM) Media         | <u>Day 16-30:</u> Grow cells in MNM media plus BDNF and GDNF (20ng/mL each). Add Laminin (10µg/mL) once a week for long-term cultures.<br><b>50% media changes twice a week</b>              | Motor neurons can be fixed for evaluation after 6 days of maturation, but for synaptic formation, 14 days in MNM media is recommended.                         |

148

149 **Supplementary Table 5: Protocol steps, including expanded step details and notes for**  
150 **motor neuron differentiation using human iPSCs.** Detailed notes include small molecule  
151 concentrations, used in this protocol, as well as comments that improve the efficacy of each step  
152 in this complex differentiation.

| <b>Astrocyte Differentiation Protocol</b>                                       |                                                                                                                          |                                                                                                                    |
|---------------------------------------------------------------------------------|--------------------------------------------------------------------------------------------------------------------------|--------------------------------------------------------------------------------------------------------------------|
| <b>Protocol Step</b>                                                            | <b>Step Details</b>                                                                                                      | <b>Notes</b>                                                                                                       |
| Dissociate and Plate iPSCs as Single Cells on TC-Treated Plates                 | Seed cells at ~40% confluency in mTESR1 media supplemented with 10µM ROCKi overnight.                                    | Coat plates with 1:100 Matrigel for 2 hours at 37°C.                                                               |
| Expand iPSCs until 60% Confluent                                                | Full media change with mTESR1 without ROCKi.                                                                             | Cells are usually ~60% confluent in two days.                                                                      |
| Neural Progenitor Cell Differentiation (NPCs)                                   | Change media to Neural Induction Media (NIM). Full media changes every day until cells are fully confluent.              | Cells are usually ~90% confluent in two to three days.                                                             |
| Passage Confluent Cell Culture                                                  | Seed cells at ~40% confluency in fresh NIM media.                                                                        | Use Trypsin-EDTA to dissociate cells, spin down at 500rpm for 5min and seed cells on Matrigel-coated plates.       |
| NPC Differentiation                                                             | Use Neural Induction Media (NIM). Full media changes every day until cells are fully confluent.                          | Cells are usually ~90% confluent in three to five days.                                                            |
| Passage Confluent Cell Culture                                                  | Seed cells at ~40% confluency in fresh NIM media on Matrigel-coated plates.                                              | Use Trypsin-EDTA to dissociate cells, spin down at 500rpm for 5min and seed cells on Matrigel-coated plates        |
| Finish NPC Differentiation                                                      | Full media changes with NIM media every day until Day 14. Dividing NPC cultures can be cryo-stored after Day 14.         | Passage cells with Trypsin-EDTA to ~40% confluency every time they are ~90% confluent. Use Matrigel-coated plates. |
| Seed NPCs at ~30% Confluency on TC-Treated Plates for Astrocyte Differentiation | Change media to Astrocyte Media (AM; Sciencell). Full media changes every 3 days until cells are fully confluent.        | Passage cells with Trypsin-EDTA to ~30% confluency every time they are ~90% confluent. Use Matrigel-coated plates. |
| Astrocyte Differentiation                                                       | Full media changes with AM media every 3 days until Day 21. Dividing astrocyte cultures can be cryo-stored after Day 21. | At day 21, differentiated cultures are mostly immature dividing astrocytes, expressing multiple canonical markers. |

153

154 **Supplementary Table 6: Protocol steps, including expanded step details and notes for**  
 155 **astrocyte differentiation using human iPSCs.** Detailed notes include small molecule  
 156 concentrations, used in this protocol, as well as comments that improve the efficacy of each step  
 157 in this differentiation.

158

| LNA Sequence Name | Docker sequence | Imager sequence |
|-------------------|-----------------|-----------------|
| P1                | TTATACATCTA     | T+AGAT+G+TATAA  |
| P2                | TTATCTACATA     | TATGT+A+G+ATAA  |
| P3                | TTTCTTCATTA     | TAAT+G+A+AGAAA  |
| P4                | TTATGAATCTA     | TA+GAT+T+CATAA  |
| P5                | TTTTAGGTAAA     | TT+T+A+CCTAAAA  |
| P6                | TTAATTGAGTA     | T+A+C+TCAATTAA  |
| P7                | TTAATTAGGAT     | A+T+CCT+AATTAA  |
| P8                | TTATAATGGAT     | A+T+CC+ATTATAA  |
| P9                | TTTAATAAGGT     | A+CC+T+TATTAAA  |
| P10               | TTATAGAGAAG     | C+T+TC+TCTATAA  |
| P12               | TTATAGTGATT     | A+ATC+A+CTATAA  |

| DNA Sequence Name | Docker sequence | Imager sequence |
|-------------------|-----------------|-----------------|
| M1                | CATATATTCGT     | GTATATAAGCA     |
| M2                | TCAGATTTTCA     | AGTCTAAAAGT     |
| M3                | CTATCAGTTTA     | GATAGTCAAAT     |
| M4                | TACTCATTGTA     | ATGAGTAACAT     |
| M5                | TTTTTAAGCCA     | AAAAATTCGGA     |
| M6                | TATTGCAATCT     | ATAACGTTAGA     |
| M7                | GTTTTCATACA     | CAAAAGTATGT     |
| M8                | CATCTTTATAG     | GTAGAAATATC     |
| M9                | CTATAGTATCT     | GATATCATAGA     |
| M10               | ACCATTTTATG     | TGGTAAAATAC     |

\* A/T/G/C+ denotes LNA nucleotide

159  
160 **Supplementary Table 7:** Published LNA/DNA [11] and newly developed DNA-only PRISM pair  
161 sequences list. Docker strands are the ones that are conjugated to antibodies, while the imager  
162 strands are the ones that are used to generate the IF/ICC signal by having them conjugated to a  
163 fluorophore, ATTO647N in the case of the LNA/DNA imagers, or ATTO647N and ATTO590 in the  
164 case of DNA-only imagers. Pluses (+) after the respective nucleotides denote an LNA substitution  
165 within the oligo. Docker sequences are presented in the 5'-3' direction, while the imager  
166 sequences are shown in the 3'-5- direction in the table. Fluorophores were conjugated on the 5'  
167 ends of the imager strands.

168

169

170

171

172 **Supplementary Data 1:** Data enclosed includes the raw analysis files and images that were used  
173 to generate the culture makeup of the day 55 stem cell derived cortical neurons. Included are also  
174 the criteria that were used to separate each cell type.

175 **Supplementary Data 2:** Data enclosed includes the raw analysis files and images that were used  
176 to generate the culture makeup of the day 85 stem cell derived cortical neurons. Included are also  
177 the criteria that were used to separate each cell type.

178 **Supplementary Data 3:** CellProfilr pipeline that was developed and used to characterize the  
179 PRISM imaging data generated in the paper.

180

181
