# Supplementary material for: Resolving cell state in iPSC-derived human neural samples with multiplexed fluorescence imaging
Source: PubMed Central journal article supplement (PMC8225800; doi:10.1038/s42003-021-02276-x), 2021-06-24
Supplement: 42003_2021_2276_MOESM7_ESM.pdf [file 42003_2021_2276_MOESM7_ESM.pdf]

## Reporting Summary

Nature Research wishes to improve the reproducibility of the work that we publish. This form provides structure for consistency and transparency in reporting. For further information on Nature Research policies, see our [Editorial Policies](#) and the [Editorial Policy Checklist](#).

### Statistics

For all statistical analyses, confirm that the following items are present in the figure legend, table legend, main text, or Methods section.

n/a Confirmed

- The exact sample size ( $n$ ) for each experimental group/condition, given as a discrete number and unit of measurement
- A statement on whether measurements were taken from distinct samples or whether the same sample was measured repeatedly
- The statistical test(s) used AND whether they are one- or two-sided  
*Only common tests should be described solely by name; describe more complex techniques in the Methods section.*
- A description of all covariates tested
- A description of any assumptions or corrections, such as tests of normality and adjustment for multiple comparisons
- A full description of the statistical parameters including central tendency (e.g. means) or other basic estimates (e.g. regression coefficient) AND variation (e.g. standard deviation) or associated estimates of uncertainty (e.g. confidence intervals)
- For null hypothesis testing, the test statistic (e.g.  $F$ ,  $t$ ,  $r$ ) with confidence intervals, effect sizes, degrees of freedom and  $P$  value noted  
*Give  $P$  values as exact values whenever suitable.*
- For Bayesian analysis, information on the choice of priors and Markov chain Monte Carlo settings
- For hierarchical and complex designs, identification of the appropriate level for tests and full reporting of outcomes
- Estimates of effect sizes (e.g. Cohen's  $d$ , Pearson's  $r$ ), indicating how they were calculated

*Our web collection on [statistics for biologists](#) contains articles on many of the points above.*

### Software and code

Policy information about [availability of computer code](#)

Data collection

Data analysis

For manuscripts utilizing custom algorithms or software that are central to the research but not yet described in published literature, software must be made available to editors and reviewers. We strongly encourage code deposition in a community repository (e.g. GitHub). See the Nature Research [guidelines for submitting code & software](#) for further information.

### Data

Policy information about [availability of data](#)

All manuscripts must include a [data availability statement](#). This statement should provide the following information, where applicable:

- Accession codes, unique identifiers, or web links for publicly available datasets
- A list of figures that have associated raw data
- A description of any restrictions on data availability

# Life sciences study design

All studies must disclose on these points even when the disclosure is negative.

|                 |                                                                                                                                                                                                                                                                             |
|-----------------|-----------------------------------------------------------------------------------------------------------------------------------------------------------------------------------------------------------------------------------------------------------------------------|
| Sample size     | We analyzed all cells that were present in the images for each run. As such the sample sizes were were working with were the entire cell population that was present, which would be largest possible sample size for the given experiment.                                 |
| Data exclusions | No data was excluded from each analysis.                                                                                                                                                                                                                                    |
| Replication     | We performed the DNA-PRISM staining for at least N=3 times on different cortical cultures, with representative images shown in the figures. All replicate were able to successfully be stained with the PRISM antibodies.                                                   |
| Randomization   | Not relevant to the study, as we analyzed all generated data.                                                                                                                                                                                                               |
| Blinding        | The CellProfile pipeline was desgined to blindly allocate cell type, based on DNA-PRISM staining. The rest of the experiments, that is, staining, antibody generation, and stem cell differentiation validation, optimization, and imaging prep did not need to be blinded. |

## Reporting for specific materials, systems and methods

We require information from authors about some types of materials, experimental systems and methods used in many studies. Here, indicate whether each material, system or method listed is relevant to your study. If you are not sure if a list item applies to your research, read the appropriate section before selecting a response.

### Materials & experimental systems

### Methods

| n/a                                 | Involved in the study                                  |
|-------------------------------------|--------------------------------------------------------|
| <input type="checkbox"/>            | <input checked="" type="checkbox"/> Antibodies         |
| <input checked="" type="checkbox"/> | <input type="checkbox"/> Eukaryotic cell lines         |
| <input checked="" type="checkbox"/> | <input type="checkbox"/> Palaeontology and archaeology |
| <input checked="" type="checkbox"/> | <input type="checkbox"/> Animals and other organisms   |
| <input checked="" type="checkbox"/> | <input type="checkbox"/> Human research participants   |
| <input checked="" type="checkbox"/> | <input type="checkbox"/> Clinical data                 |
| <input checked="" type="checkbox"/> | <input type="checkbox"/> Dual use research of concern  |

| n/a                                 | Involved in the study                           |
|-------------------------------------|-------------------------------------------------|
| <input checked="" type="checkbox"/> | <input type="checkbox"/> ChIP-seq               |
| <input checked="" type="checkbox"/> | <input type="checkbox"/> Flow cytometry         |
| <input checked="" type="checkbox"/> | <input type="checkbox"/> MRI-based neuroimaging |

## Antibodies

Antibodies used

Marker; Company; Catalog #; Host; Tested; Working  
 GFAP RnD Systems AF2594 sheep Yes Yes  
 GFAP Abcam ab190288 mouse Yes No  
 Nestin RnD Systems MAB1259 mouse Yes Yes  
 Nestin ThermoFisher MA1-110 mouse Yes Yes  
 Nestin Abcam ab22035 mouse Yes Yes  
 Vimentin RnD Systems MAB2105 rat Yes Yes  
 Vimentin RnD Systems AF2105 goat Yes No  
 Vimentin [V9] ThermoFisher MA5-11883 mouse Yes Yes  
 Vimentin Abcam ab92547 rabbit Yes Yes  
 CD44 RnD Systems AF6127 sheep Yes No  
 CD44 Novus NBP1-47386 mouse Yes Yes  
 CD44 Abcam ab15707 rabbit Yes Yes  
 GLAST/EAAT1 Abcam ab416 rabbit Yes Yes  
 S100-beta Abcam ab52642 rabbit Yes Yes  
 TBR1 Abcam ab31940 rabbit Yes Yes  
 Ctip2 Abcam ab18465 rat Yes Yes  
 MAP2 Novus NB300-213 chicken Yes Yes  
 MAP2 Novus NB100-98717 sheep Yes No  
 $\beta$ -III-Tubulin/Tuj1 Sigma Aldrich T5076-200ul mouse Yes Yes  
 $\beta$ -III-Tubulin/Tuj1 Novus NB100-1612 chicken Yes No  
 SATB2 Abcam ab51502 mouse Yes Yes  
 CDP/CUTL1/CUX1 Pierce Chemical PA525788 rabbit Yes Yes  
 Synapsin I Abcam ab64581 goat Yes Yes  
 GABA B1 Receptor Abcam ab55051 mouse Yes Yes  
 200kD Neurofilament Novus AF3108 goat Yes No  
 200kD Neurofilament Novus NBP1-97726 mouse Yes Yes  
 CaMKII-alpha Abcam ab54925 mouse Yes Maybe  
 VGLuT1 ThermoFisher 48-2400 rabbit Yes No

Vgat Novus MAB6847 mouse Yes Yes  
 Gephyrin Abcam ab181382 rabbit Yes Maybe  
 Islet 1 RnD Systems AF1837 goat Yes Yes  
 Islet 1 Abcam ab109517 rabbit Yes Yes  
 Cortactin Novus NBP2-15971 rabbit Yes Maybe  
 ChAT Abcam ab181023 rabbit Yes Yes  
 Pax6 ThermoFisher 42-6600 rabbit Yes Yes  
 SOX2 RnD Systems MAB2018 mouse Yes Yes  
 ZO-1 ThermoFisher 61-7300 rabbit Yes Yes  
 SSEA1 RnD Systems MAB2155 mouse Yes Yes  
 SOX1 Abcam ab87775 rabbit Yes Yes  
 Nanog ThermoFisher PA1-097 rabbit Yes Yes  
 E-Cadherin ThermoFisher 13-1700 mouse Yes Yes  
 SSEA4 ThermoFisher MA1-021 mouse Yes Yes  
 Oct-3/4 RnD Systems MAB1759 rat Yes Yes  
 $\alpha$ -Tubulin [TU-01] ThermoFisher MA1-19162 mouse Yes Yes  
 $\alpha$ -Tubulin [TU-01] ThermoFisher 13-8000 mouse Yes Yes  
 $\alpha$ -Tubulin [DM1a] Sigma Aldrich T6199-200ul mouse Yes No  
 $\alpha$ -Tubulin [DM1a] Abcam ab7291 mouse Yes Yes  
 $\alpha$ -Tubulin [DM1a] Novus NB100-690 mouse Yes Yes  
 $\gamma$ -Tubulin Abcam ab11316 mouse Yes Yes  
 Pericentrin Abcam ab4448 rabbit Yes Yes  
 Actin/Phalloidin488 ThermoFisher A12379 - Yes Yes  
 Actin/Phalloidin568 ThermoFisher A12380 - Yes Yes  
 Actin/Phalloidin598 ThermoFisher A12381 - Yes Yes  
 Actin/Phalloidin660 ThermoFisher A22285 - Yes Yes  
 Donkey anti-Guinea Pig Jackson 706-005-148 - Yes Yes  
 Donkey anti-Chicken ThermoFisher SA1-72002 - Yes Yes  
 Donkey anti-Chicken Rockland 603-701-C37 - Yes Yes  
 Donkey anti-Mouse ThermoFisher A16019 - Yes Yes  
 Donkey anti-Rabbit ThermoFisher A16037 - Yes Yes  
 Donkey anti-Goat ThermoFisher A16007 - Yes Yes  
 Donkey anti-Rat ThermoFisher A24545 - Yes Yes  
 Donkey anti-Sheep ThermoFisher A16050 - Yes Yes  
 DAPI ThermoFisher 62248 - Yes Yes

## Validation

We validated each antibody based on positive vs negative and secondary-only staining. Then the generated imaged were compared to published examples and images from the manufacturer for the staining pattern. Only antibodies that generated matching results in our stem cell derived neural cultures were selected for DNA-PRISM modification and use.
